# Supplementary material for: Structural delineation and computational design of SARS-CoV-2-neutralizing antibodies against Omicron subvariants
Source: PubMed Central journal article supplement (PMC10349087; doi:10.1038/s41467-023-39890-8), 2023-07-14
Supplement: 41467_2023_39890_MOESM1_ESM.pdf [file 41467_2023_39890_MOESM1_ESM.pdf]

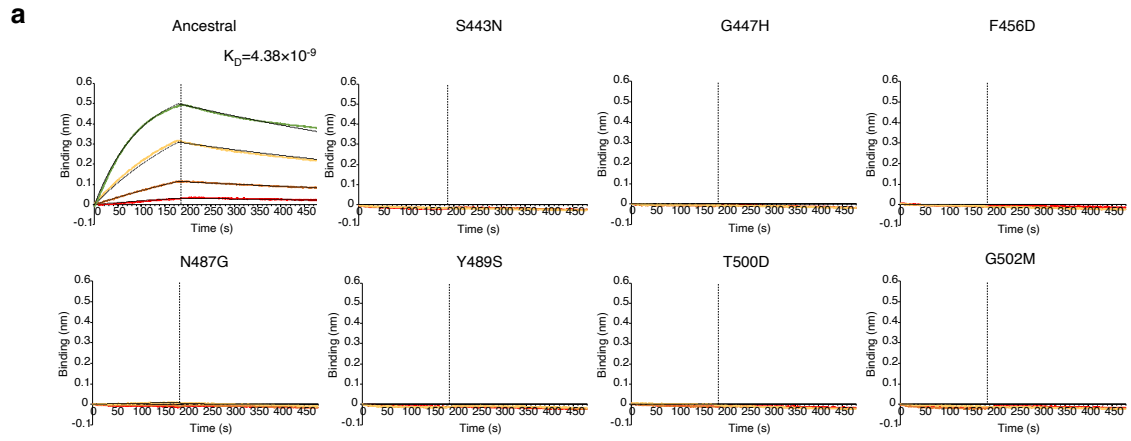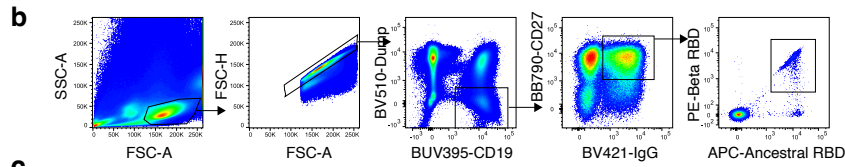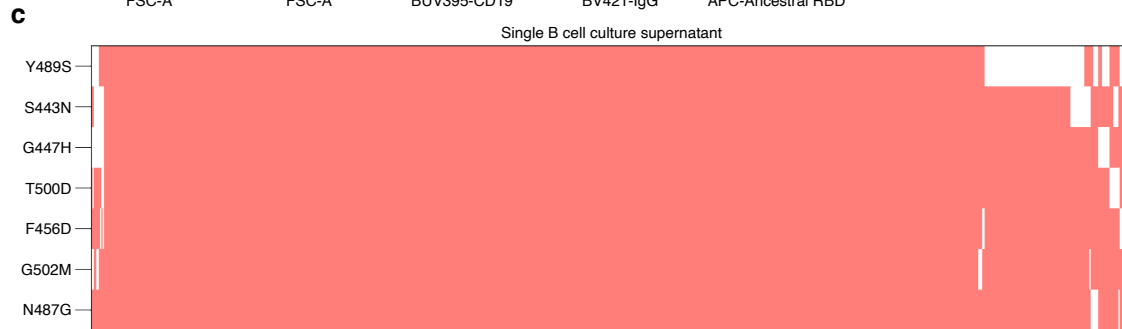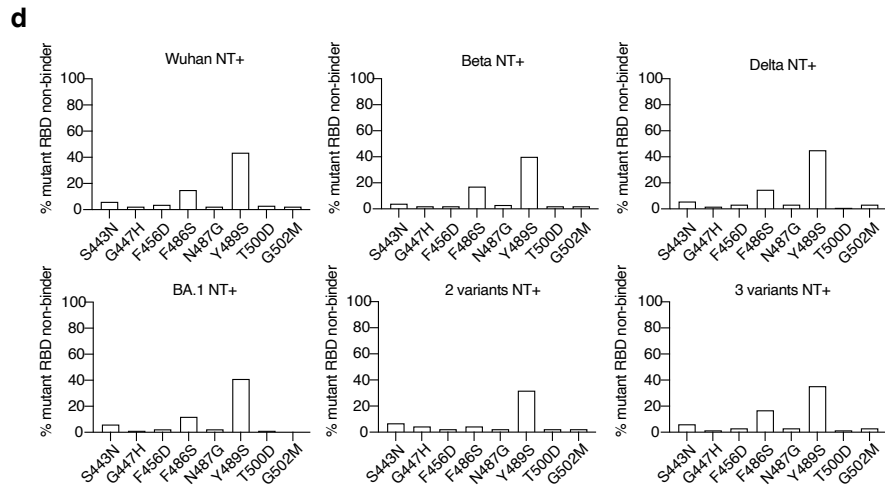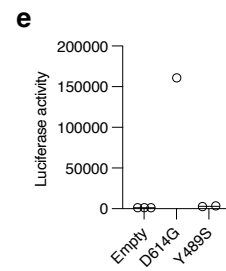

**Supplementary Figure 1. Single B cell culture supernatant screening.** **a** Binding affinity of hACE2 and recombinant RBDs were analyzed by bio-layer interferometry. **b** Sorting strategy for antigen-specific memory B cell sorting. Signals of CD2, CD4, CD10, CD14, IgD, and live/dead were detected in the “Dump” channel. **c** Binding of culture supernatants to each mutant RBDs is shown. Each line represents data from a single well. Wells with signals above the threshold are shown in red, and below the threshold are in white. **d** Percentages of culture supernatants with no binding to indicate mutant RBDs are shown. **e** Luciferase activity of pseudovirus containing indicated spike proteins is shown.

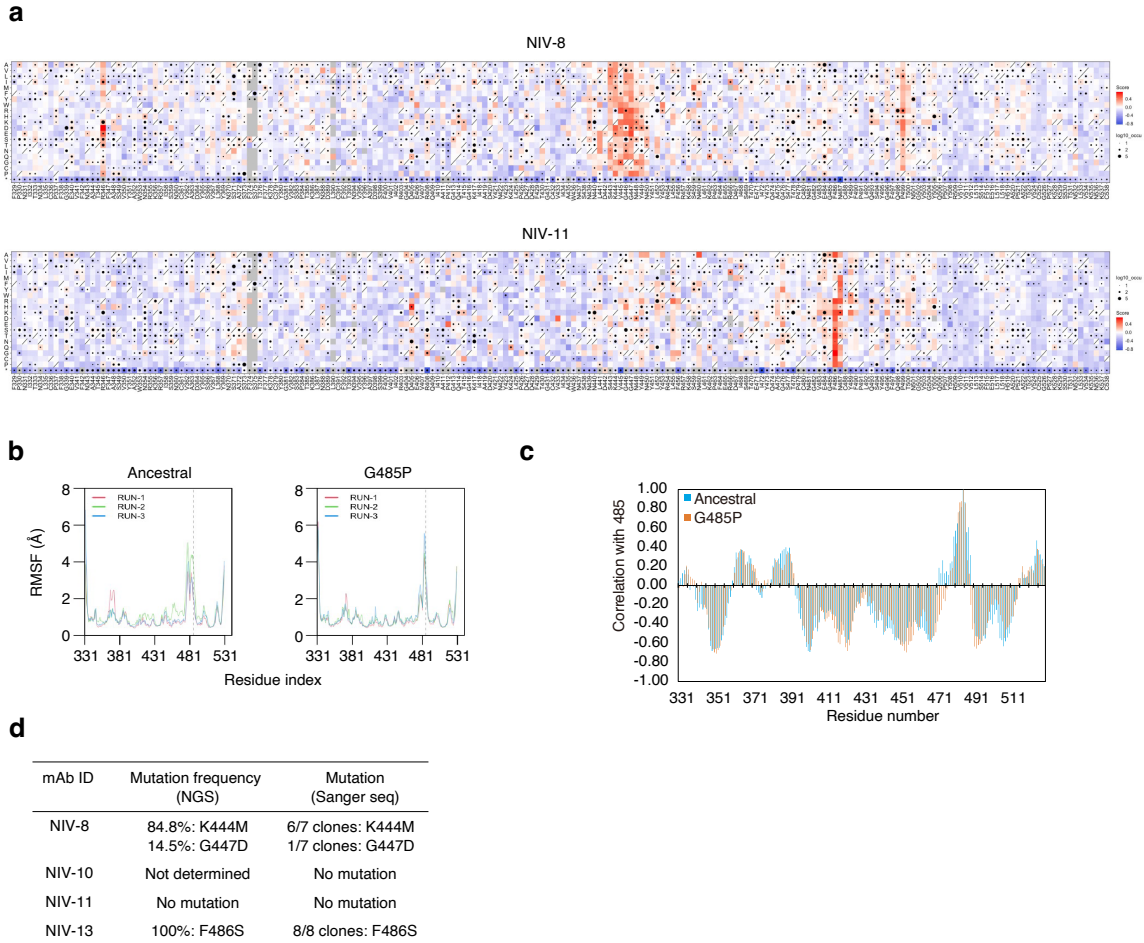

**Supplementary Figure 2. Escape mutation analysis.** **a** Full heat maps of escape fractions for NIV-8 and NIV-11 are shown. **b** Root mean square fluctuation of C $\alpha$  atoms in the MD simulations. Dashed lines indicate the mutational site 485. **c** Cross correlations between residue at 485 and within the RBD in the MD simulations. **d** Escape variants were screened by passaging ancestral virus in the presence of the indicated monoclonal antibody. After limited-dilution cloning, RBD mutations were analyzed by next-generation sequencing (NGS) and by sanger sequencing.

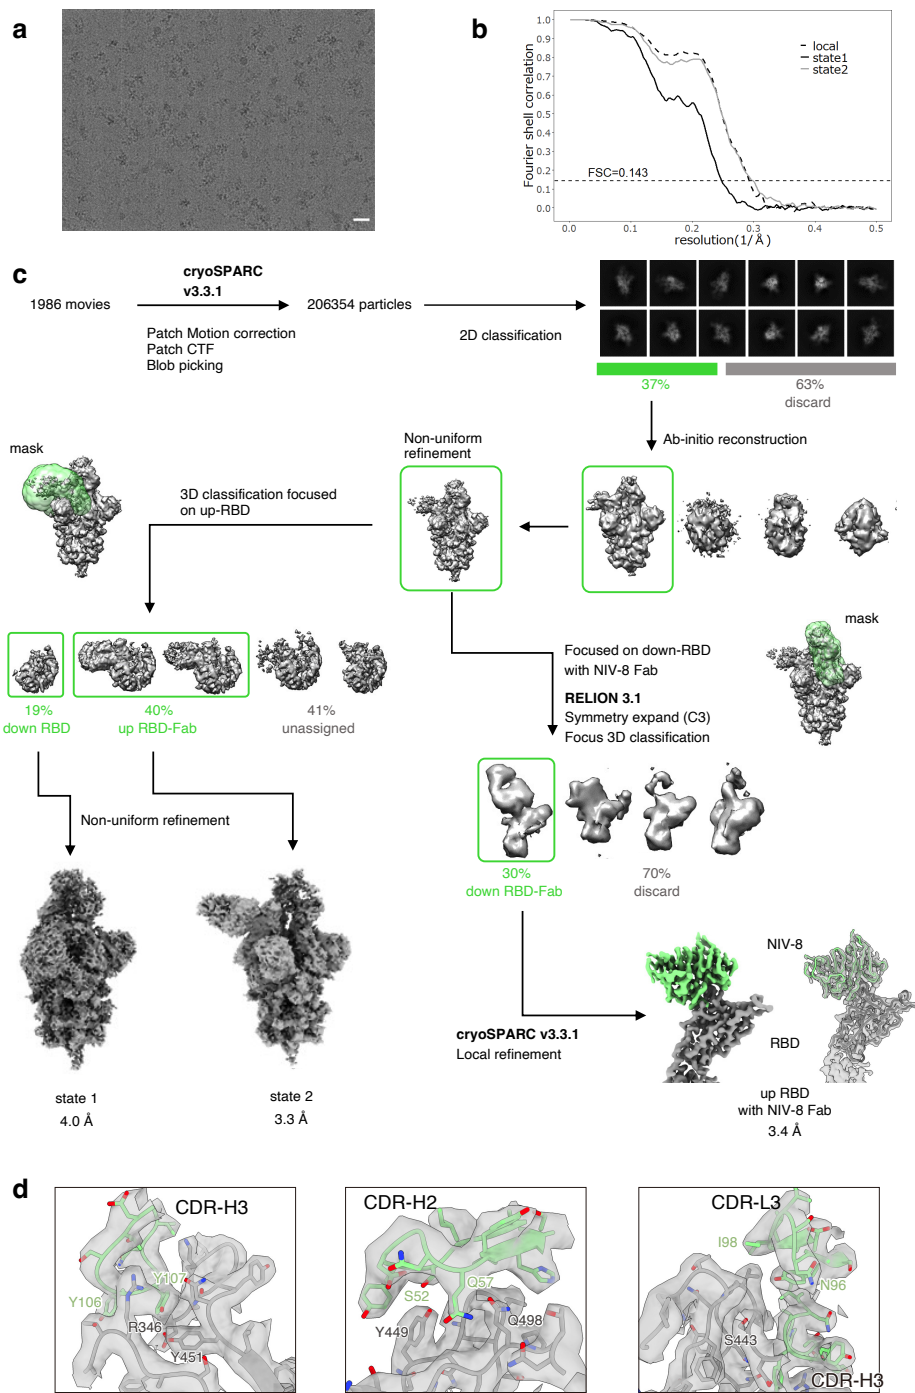

**Supplementary Figure 3. Cryo-EM data processing of SARS-CoV-2 spike trimer complexed with NIV-8 Fab.** **a** A representative raw cryo-EM micrograph (scale bar, 20 nm) from 1986 micrographs for this dataset. **b** Resolution assessment of the Spike-NIV-8 maps by Gold-standard

Fourier shell correlation (FSC) curves at 0.143 criteria. **c** Cryo-EM data processing flowchart. **d** The corresponding cryo-EM map fitting with the model around RBD and NIV-8 Fab interface.

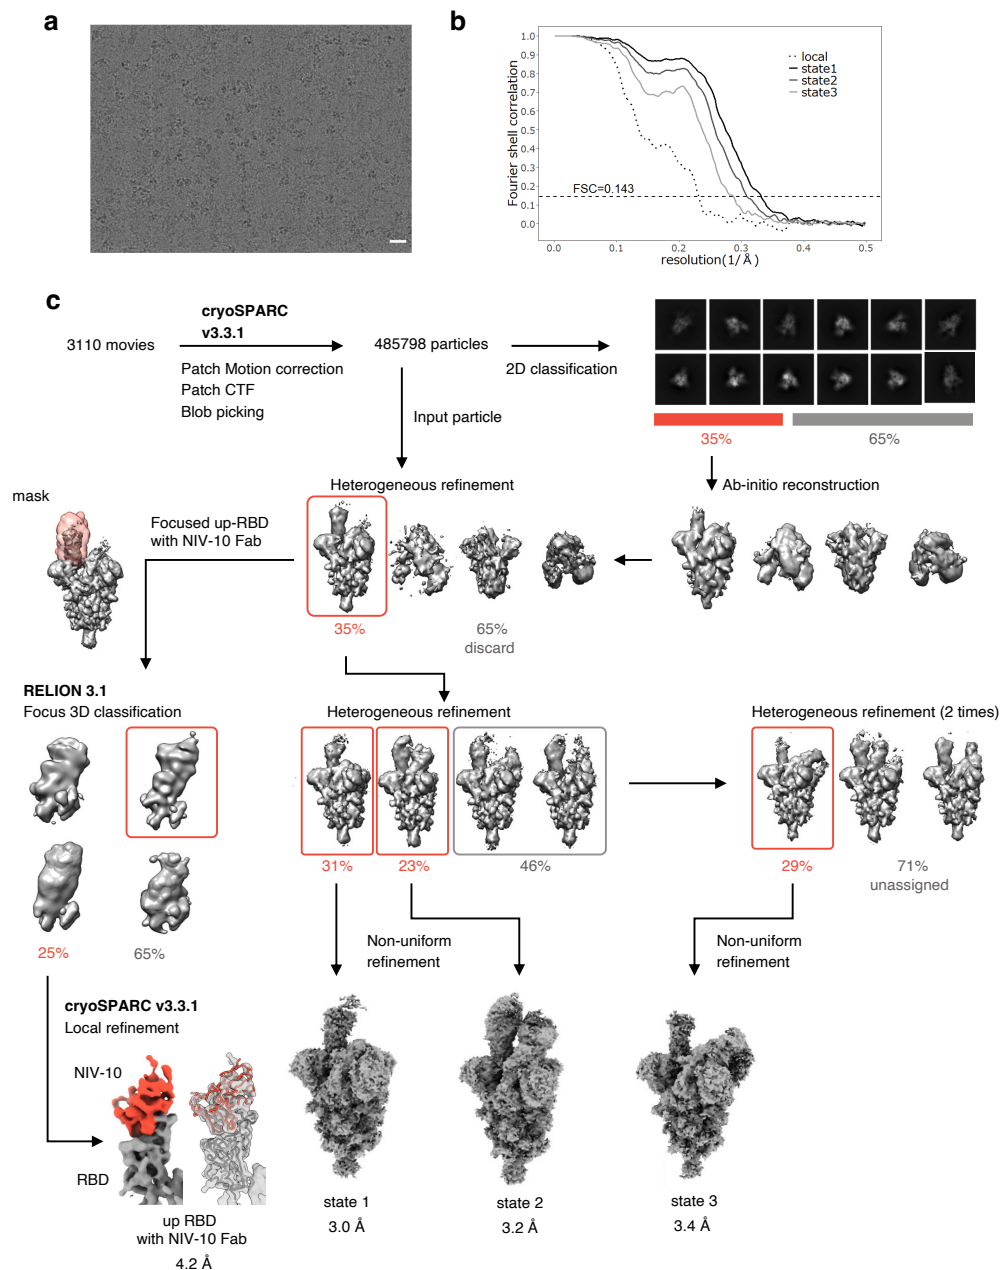

**Supplementary Figure 4. Cryo-EM data processing of SARS-CoV-2 spike trimer complexed with NIV-10 Fab.** **a** A representative raw cryo-EM micrograph (scale bar, 20 nm) from 3110 micrographs for this dataset. **b** Resolution assessment of the Spike-NIV-10 maps by Gold-standard Fourier shell correlation (FSC) curves at 0.143 criteria. **c** Cryo-EM data processing flowchart.

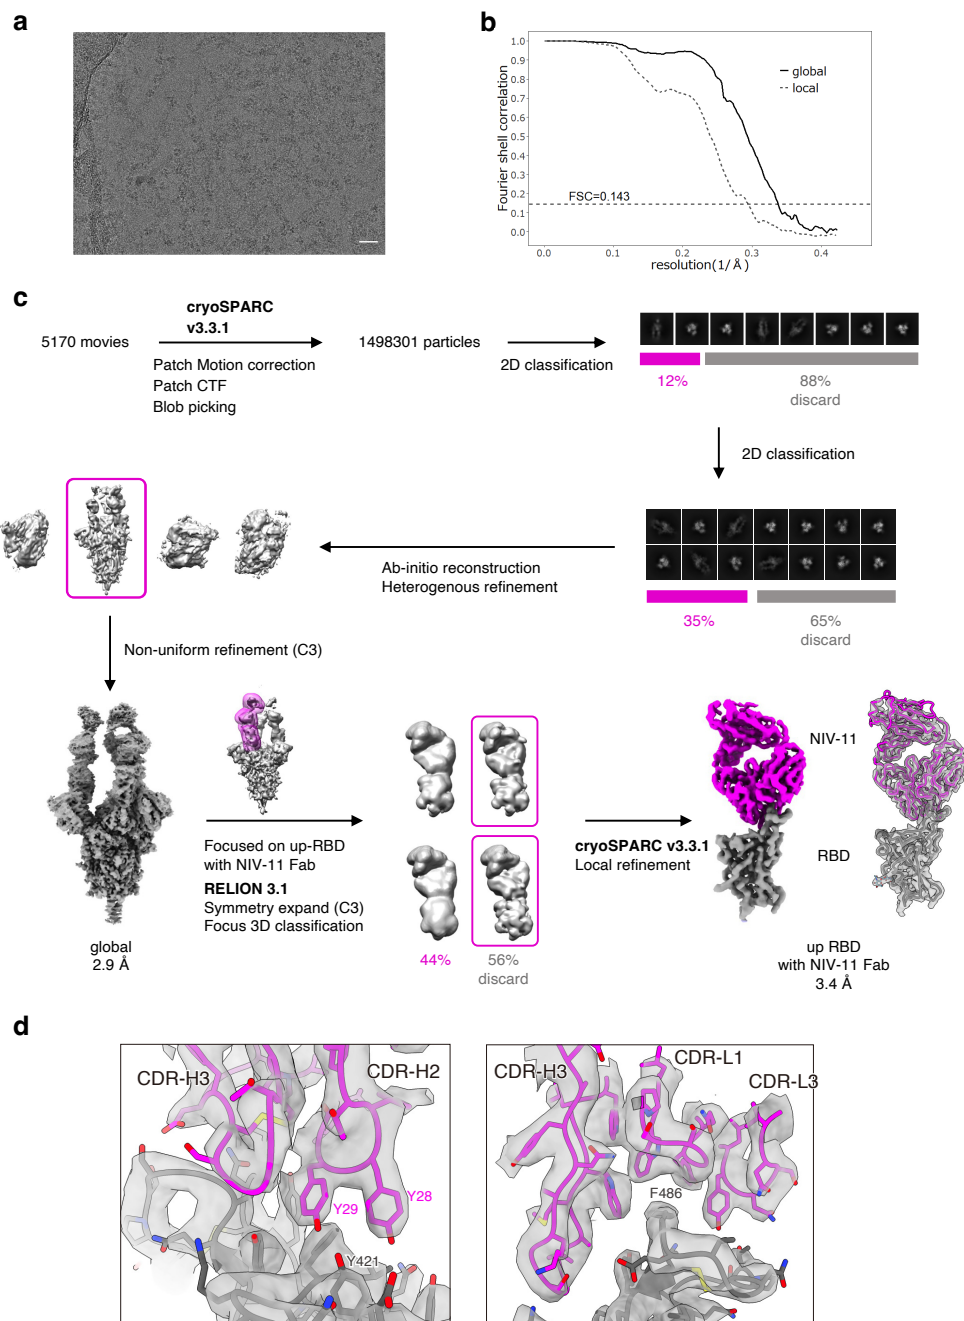

**Supplementary Figure 5. Cryo-EM data processing of SARS-CoV-2 spike trimer complexed with NIV-11 Fab.** **a** A representative raw cryo-EM micrograph (scale bar, 20 nm) from 5170 micrographs for this dataset. **b** Resolution assessment of the Spike-NIV-11 maps by Gold-standard Fourier shell correlation (FSC) curves at 0.143 criteria. **c** Cryo-EM data processing flowchart. **d** The corresponding cryo-EM maps fitting with the model around RBD and NIV-8 Fab interface.



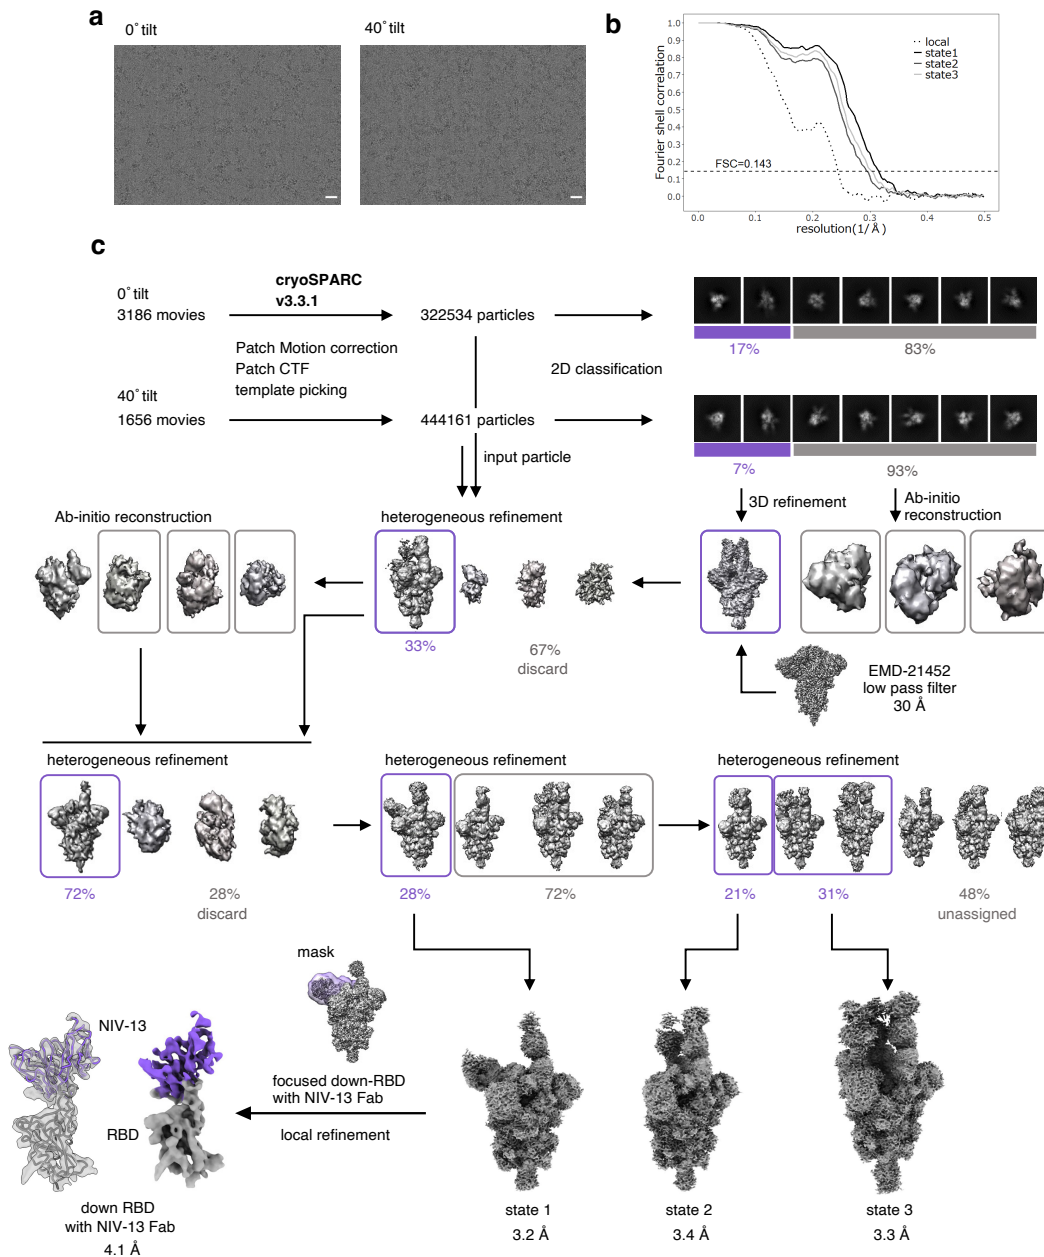

**Supplementary Figure 6. Cryo-EM data processing of SARS-CoV-2 spike trimer complexed NIV-13 Fab.** **a** Representative raw cryo-EM micrographs (scale bar, 20 nm) from 3186 and 1656 micrographs for the 0° (Left) and 40° tilt (Right) datasets, respectively. **b** Resolution assessment of the Spike-NIV-13 maps by Gold-standard Fourier shell correlation (FSC) curves at 0.143 criteria. **c** Cryo-EM data processing flowchart.



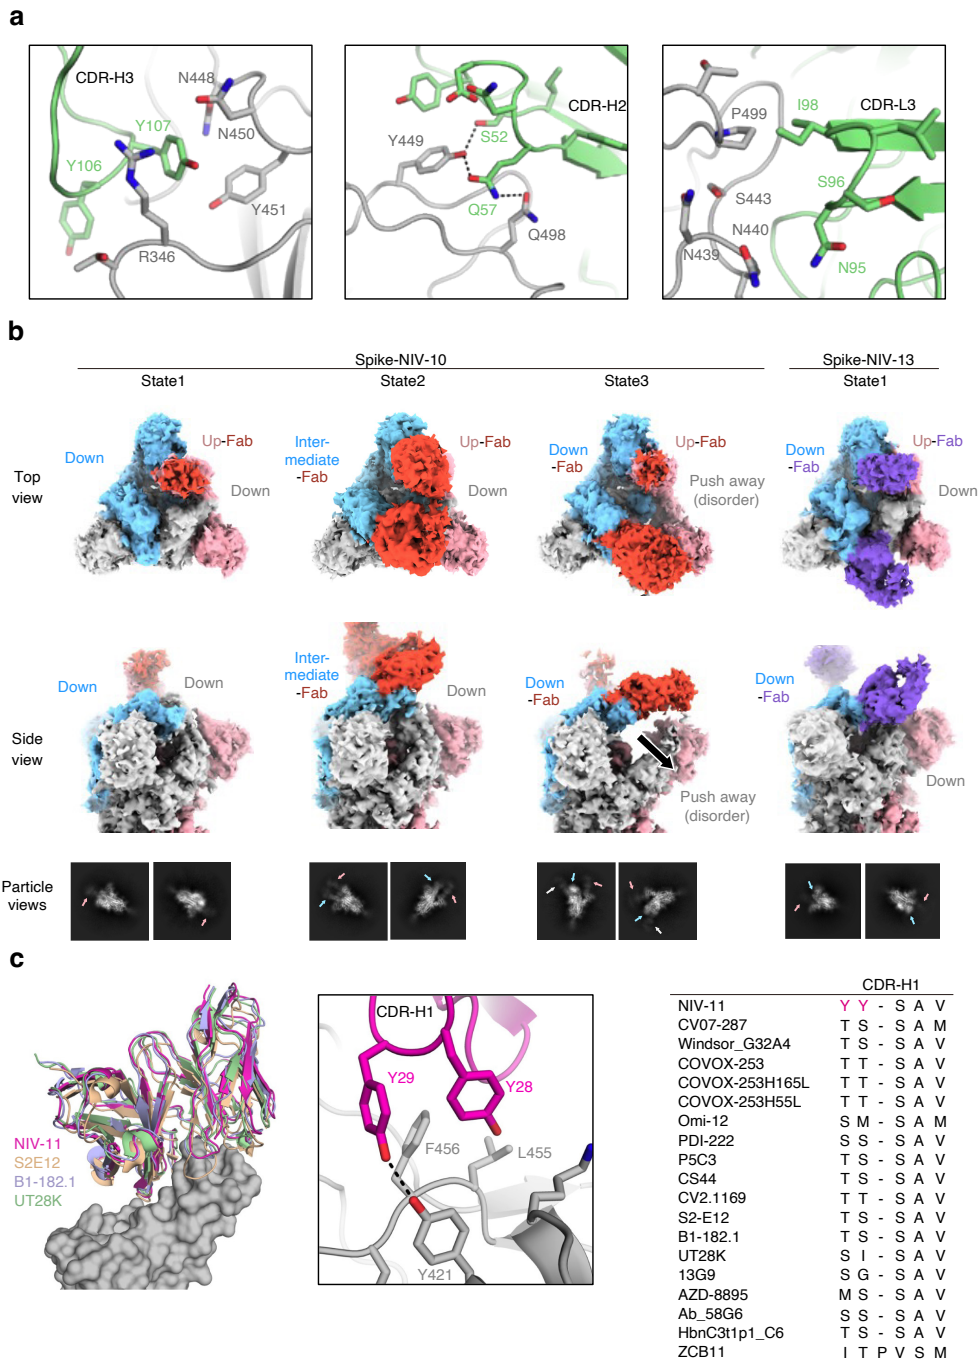

**Supplementary Figure 7. Structural characterizations of spike protein in complex with Fabs. a** Detailed recognition mode of CDR-H3 (left), CDR-H2 (middle), and CDR-L3 (right) of NIV-8. The dotted lines indicate polar interactions. **b** Top and side views of maps of each binding state of the Spike-NIV-10 and Spike-NIV-13 complexes. The particle views are also shown with arrows

indicating Fab bound to spike. The colors of the maps are indicated with the same color as in Fig. 5a. **c** (left) NIV-11 was superimposed on IGHV1-58/IGKV3-20 paired antibodies, S2E12, B1-182.1, UT28K. (middle) Detailed recognition mode of CDR-H1 of NIV-11. (right) Sequence alignment of CDR-H1 from IGHV1-58/IGKV3-20 paired antibodies.

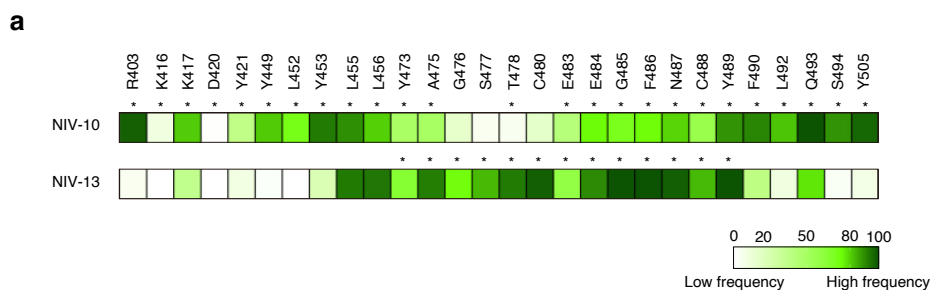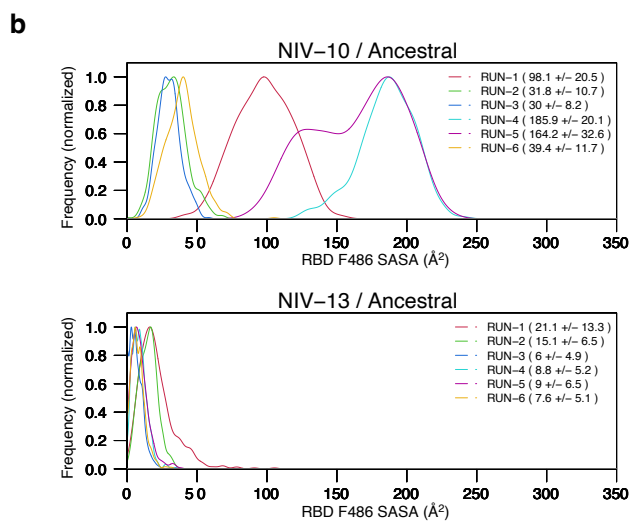

### Supplementary Figure 8. MD simulations of RBD and Fabs.

**a** Frequency of contacts (4.5 Å cut-off) observed for the antibodies/RBD residue pairs in the MD simulations are shown as heatmaps. Asterisks represent epitope information observed in the crystal or cryo-EM structures. **b** Distributions of solvent accessible surface area (SASA) of RBD F486 in the MD simulations are shown. The SASA averages and the standard deviations of the last 50 ns trajectories are provided in parenthesis.

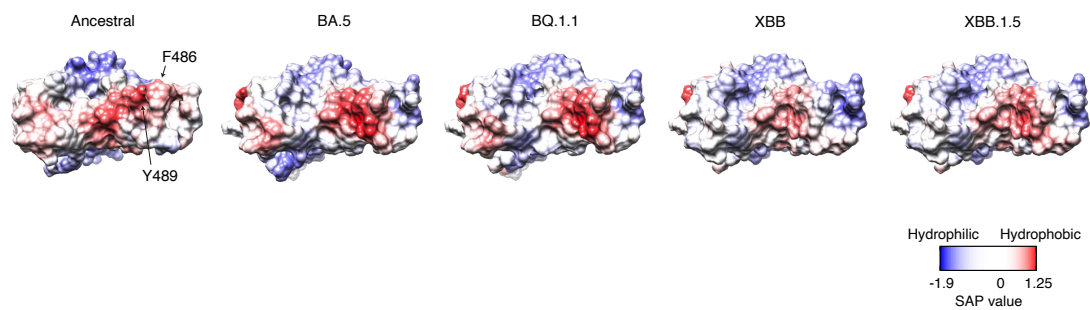

**Supplementary Figure 9. SAP values for variant RBDs.**

Surface representations of RBD variants are colored according to the SAP values. The viewing angle was the same as that shown in Fig. 6a.

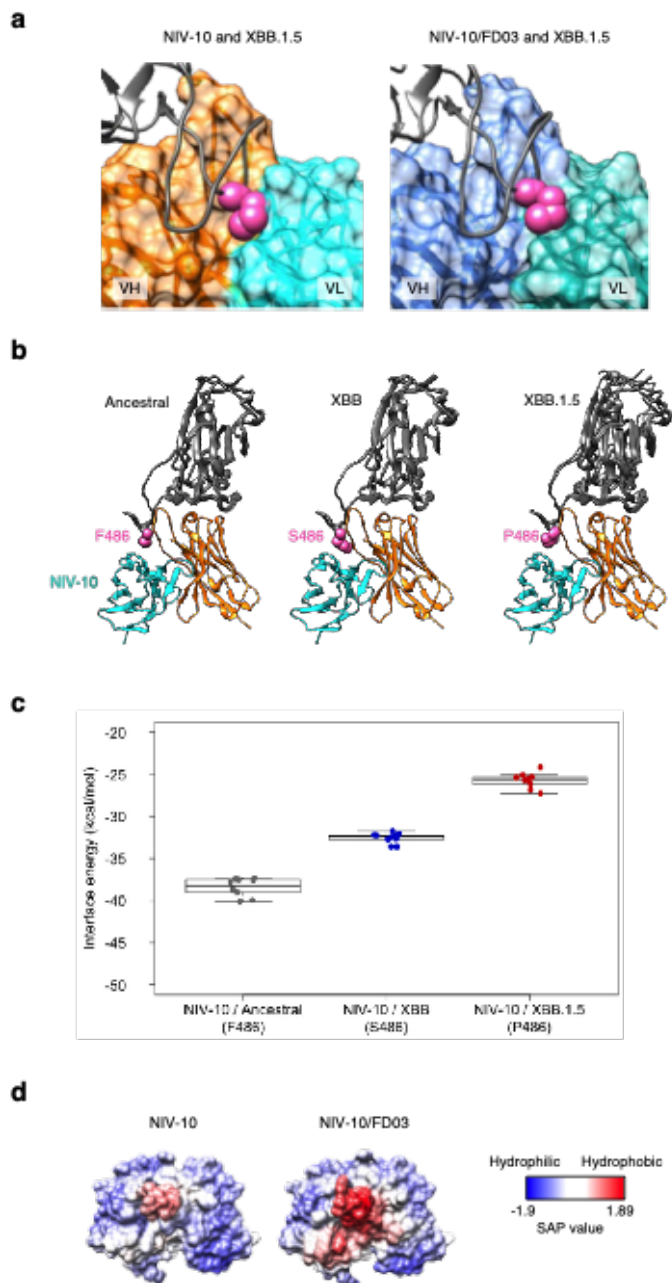

**Supplementary Figure 10. Computational assessment of antibody-antigen interfaces.**

**a** Structural comparison of XBB.1.5 with NIV-10 (left) and NIV-10/FD03 (right). P486 (pink ball) clashed with the light chain of NIV-10. **b** Overview of the predicted antibody-antigen complexes. XBB.1.5 exhibited greater structural variation. **c** Interface energies of the top 10 models (out of 20) determined by high-resolution docking simulations between NIV-10 and ancestral, XBB, or XBB.1.5

RBD. Each symbol represents one docking model. Box represents 1<sup>st</sup> quartile, median and 3<sup>rd</sup> quartile. The whiskers represent the minima and maxima. **d** Surface representations of the Fv region of NIV-10 and NIV-10/FD03 are colored according to the SAP values. The viewing angle is the same as that in Fig. 6b and c.

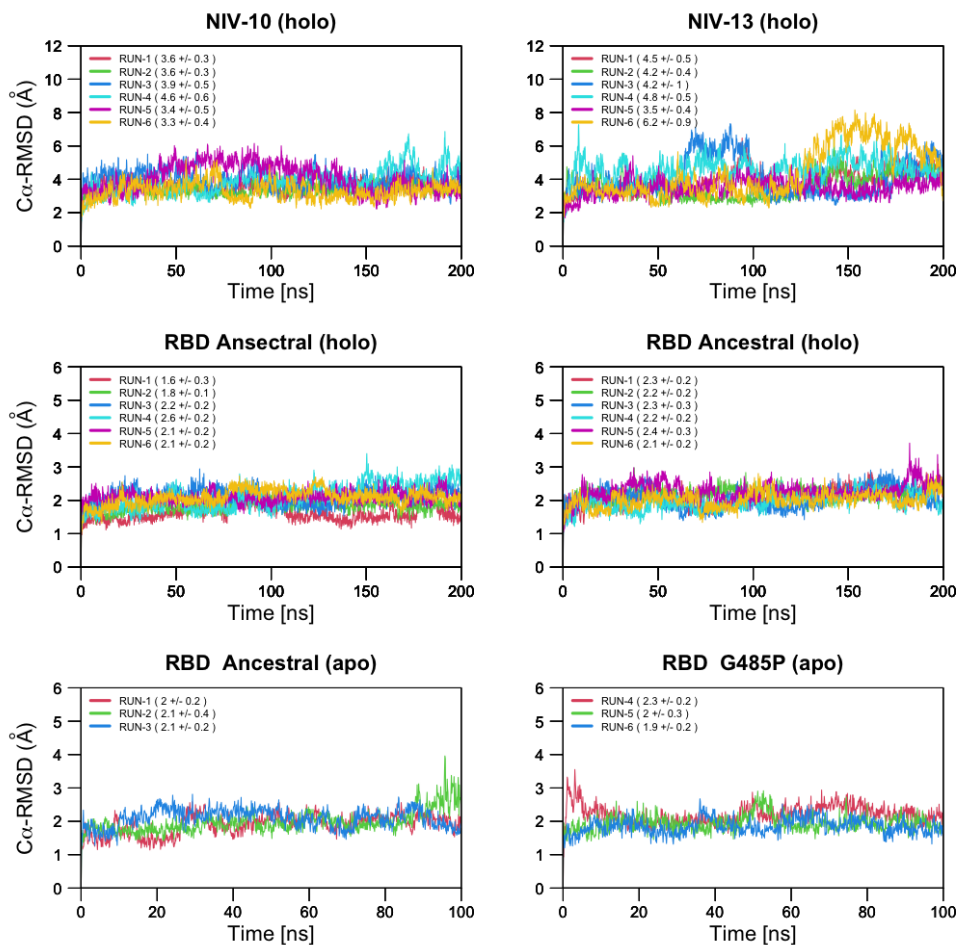

**Supplementary Figure 11. Root mean square deviation (RMSD) of C $\alpha$  atoms of the antibodies and RBD during each simulation.** Averages and standard deviations of the last 50 ns of each simulation are shown in parenthesis.



### Supplementary Table 1. Patient information

| <b>ID</b> | <b>Age</b> | <b>Sex</b> | <b>Time after infection (day)</b> | <b>Disease severity</b> | <b>Vaccine</b> | <b>Time after vaccination (day)</b> |
|-----------|------------|------------|-----------------------------------|-------------------------|----------------|-------------------------------------|
| Tcc-028   | 49         | Male       | 281                               | Mild                    | 2x mRNA-1273   | 62                                  |
| Tcc-029   | 38         | Male       | 311                               | Moderate                | -              | -                                   |
| Tcc-034   | 52         | Female     | 223                               | Moderate                | -              | -                                   |

All volunteers provided written informed consent prior to enrolment.

**Supplementary Table 2. Antibody V(D)J usage**

| mAb    | HV       | HJ    | HD       | H-CDR3 AA           | LV        | LJ    | L-CDR3 AA   | Patient ID                     |
|--------|----------|-------|----------|---------------------|-----------|-------|-------------|--------------------------------|
| NIV-1  | IGHV4-34 | IGHJ4 | IGHD5-12 | ARGLYSGYDLAY        | IGLV2-14  | IGLJ1 | SSYTSSNTYV  | Tcc-029-d311 /<br>Tcc-034-d223 |
| NIV-5  | IGHV5-51 | IGHJ4 | IGHD2-15 | TRGGILCNGASCAADF    | IGKV3-15  | IGKJ5 | QQYNNWPYT   | Tcc-029-d311 /<br>Tcc-034-d223 |
| NIV-6  | IGHV4-39 | IGHJ4 | IGHD3-3  | TRLGGRGFTPEFDY      | IGLV10-54 | IGLJ3 | SAWDITLSAWV | Tcc-029-d311 /<br>Tcc-034-d223 |
| NIV-8  | IGHV3-30 | IGHJ4 | IGHD3-22 | ARDGPDTSGYYANIYDFD  | IGLV1-40  | IGLJ3 | QSYDNSLILAV | Tcc-029-d311 /<br>Tcc-034-d223 |
| NIV-9  | IGHV3-49 | IGHJ4 | IGHD3-10 | TRALPYVSGDY         | IGLV1-44  | IGLJ2 | ATWDDSLNGPA | Tcc-029-d311 /<br>Tcc-034-d223 |
| NIV-10 | IGHV3-7  | IGHJ4 | IGHD3-9  | ARDGGYNILTAYYHAPSY  | IGLV2-14  | IGLJ2 | SSYTGRSPYVV | Tcc-029-d311 /<br>Tcc-034-d223 |
| NIV-11 | IGHV1-58 | IGHJ3 | IGHD2-15 | AAPNCTGGSCYDGFNL    | IGKV3-20  | IGKJ1 | QQYGSSPWL   | Tcc-029-d311 /<br>Tcc-034-d223 |
| NIV-12 | IGHV1-58 | IGHJ3 | IGHD2-15 | AAPFCSSGSCYDGFNI    | IGKV3-20  | IGKJ1 | QQYGSSPWT   | Tcc-029-d311 /<br>Tcc-034-d223 |
| NIV-13 | IGHV3-23 | IGHJ1 | IGHD3-22 | AKGDYYDSSGYLAIEYFPH | IGLV3-25  | IGLJ2 | QSTDISGVL   | Tcc-029-d311 /<br>Tcc-034-d223 |
| NIV-15 | IGHV2-5  | IGHJ4 | IGHD3-3  | AQHTISKIFDH         | IGLV2-14  | IGLJ2 | SSYTSGNLPLV | Tcc-029-d311 /<br>Tcc-034-d223 |
| NIV-20 | IGHV3-53 | IGHJ5 | IGHD1-26 | ARDLGVVGGTDQ        | IGKV3-15  | IGKJ2 | QQYNNWPPGYT | Tcc-034-d223                   |
| NIV-22 | IGHV3-9  | IGHJ6 | IGHD6-13 | AKARFPGLAAAGYYGLDV  | IGLV2-8   | IGLJ2 | SSYAGSNLNV  | Tcc-034-d223                   |
| NIV-29 | IGHV3-66 | IGHJ5 | IGHD1-26 | ARDLGPVGATDQ        | IGKV3-15  | IGKJ2 | QQYISWPPGYT | Tcc-028-d281                   |
| NIV-30 | IGHV1-69 | IGHJ6 | IGHD1-1  | ARVGGHWNDPFNYGMDV   | IGKV2-28  | IGKJ1 | MQALQTPT    | Tcc-028-d281                   |
| NIV-35 | IGHV1-58 | IGHJ3 | IGHD1-1  | AAPHCNRTNCDYDGFDL   | IGKV3-20  | IGKJ1 | QQYGSSPWT   | Tcc-028-d281                   |
| NIV-36 | IGHV3-53 | IGHJ4 | IGHD1-26 | ARDLGSVGGTDF        | IGKV3-15  | IGKJ2 | QQYISWPPGYT | Tcc-028-d281                   |

**Supplementary Table 3. Antibody affinity.**

|        |                 | Ancestral              | Delta                  | BA.1                   | BA.2                  |
|--------|-----------------|------------------------|------------------------|------------------------|-----------------------|
| NIV-8  | $k_{on}$ (1/Ms) | $1.06 \times 10^5$     | $2.69 \times 10^5$     | $1.26 \times 10^5$     | $1.03 \times 10^5$    |
|        | $k_{off}$ (1/s) | $1.15 \times 10^{-6}$  | $1.28 \times 10^{-6}$  | $3.12 \times 10^{-3}$  | $2.06 \times 10^{-3}$ |
|        | $K_D$ (M)       | $1.09 \times 10^{-11}$ | $4.75 \times 10^{-12}$ | $2.47 \times 10^{-8}$  | $2.00 \times 10^{-8}$ |
| NIV-10 | $k_{on}$ (1/Ms) | $2.23 \times 10^5$     | $3.54 \times 10^5$     | $1.29 \times 10^5$     | $8.41 \times 10^4$    |
|        | $k_{off}$ (1/s) | $1.24 \times 10^{-6}$  | $1.31 \times 10^{-6}$  | $1.24 \times 10^{-2}$  | $6.40 \times 10^{-3}$ |
|        | $K_D$ (M)       | $5.42 \times 10^{-12}$ | $3.71 \times 10^{-12}$ | $9.66 \times 10^{-8}$  | $7.61 \times 10^{-8}$ |
| NIV-11 | $k_{on}$ (1/Ms) | $5.36 \times 10^4$     | $1.06 \times 10^5$     | $3.66 \times 10^5$     | $3.22 \times 10^5$    |
|        | $k_{off}$ (1/s) | $1.12 \times 10^{-6}$  | $5.08 \times 10^{-7}$  | $3.35 \times 10^{-3}$  | $3.55 \times 10^{-3}$ |
|        | $K_D$ (M)       | $2.08 \times 10^{-11}$ | $4.78 \times 10^{-12}$ | $9.14 \times 10^{-9}$  | $1.10 \times 10^{-8}$ |
| NIV-13 | $k_{on}$ (1/Ms) | $1.63 \times 10^5$     | $4.05 \times 10^5$     | $3.09 \times 10^5$     | $2.47 \times 10^5$    |
|        | $k_{off}$ (1/s) | $1.19 \times 10^{-6}$  | $3.72 \times 10^{-5}$  | $2.48 \times 10^{-4}$  | $3.69 \times 10^{-4}$ |
|        | $K_D$ (M)       | $7.33 \times 10^{-12}$ | $9.19 \times 10^{-11}$ | $8.02 \times 10^{-10}$ | $1.49 \times 10^{-9}$ |

$K_D$  of indicated Fabs and RBDs were determined by bio-layer interferometry.

**Supplementary Table 4. List of amino acid substitutions that occur by single nucleotide mutations.**

| Position | Nucleotide code | Single nucleotide mutation (amino acid substitution)                   |
|----------|-----------------|------------------------------------------------------------------------|
| T345     | ACC             | TCC (S), CCC (P), GCC (A), ATC (I), AAC (N), AGC (S)                   |
| R346     | AGA             | GGA (G), ATA (I), ACA (T), AAA (K), AGT (S), AGC (S)                   |
| R403     | AGA             | GGA (G), ATA (I), ACA (T), AAA (K), AGT (S), AGC (S)                   |
| D405     | GAT             | GTT (V), GCT (A), GGT (G), TAT (Y), CAT (H), AAT (N), GAA (E), GAG (E) |
| G416     | GGA             | GTA (V), GCA (A), GAA (E), CGA (R), AGA (R)                            |
| K417     | AAG             | ATG (M), ACG (T), AGG (R), CAG (Q), GAG (E), AAT (N), AAC (N)          |
| D420     | GAT             | TAT (Y), CAT (H), AAT (N), GTT (V), GCT (A), GGT (G), GAA (E), GAG (E) |
| Y421     | TAT             | TTT (F), TCT (S), TGT (C), CAT (H), AAT (N), GAT (D)                   |
| N440     | AAT             | CAT (H), TAT (Y), GAT (D), ATT (I), ACT (T), AGT (S), AAA (K), AAG (K) |
| L441     | CTT             | TTT (F), ATT (I), GTT (V), CCT (P), CAT (H), CGT (R)                   |
| D442     | GAT             | TAT (Y), CAT (H), AAT (N), GTT (V), GCT (A), GGT (G), GAA (E), GAG (E) |
| S443     | TCT             | CCT (P), ACT (T), GCT (A), TTT (F), TAT (Y), TGT (C)                   |
| K444     | AAG             | ATG (M), ACG (T), AGG (R), CAG (Q), GAG (E), AAT (N), AAC (N)          |
| V445     | GTT             | GCT (A), GAT (D), GGT (G), TTT (F), CTT (L), ATT (I)                   |
| G446     | GGT             | TGT (C), CGT (R), AGT (S)                                              |
| G447     | GGT             | TGT (C), CGT (R), AGT (S)                                              |
| N448     | AAT             | CAT (H), TAT (Y), GAT (D), ATT (I), ACT (T), AGT (S), AAA (K), AAG (K) |
| Y449     | TAT             | TTT (F), TCT (S), TGT (C), CAT (H), AAT (N), GAT (D)                   |
| N450     | AAT             | CAT (H), TAT (Y), GAT (D), ATT (I), ACT (T), AGT (S), AAA (K), AAG (K) |
| Y451     | TAC             | GGC (F), TCC (S), TGC (C), CAC (H), AAC (N), GAC (D)                   |
| L452     | CTG             | GTA (V), GCA (A), GAA (E), CGA (R), AGA (R)                            |
| Y453     | TAT             | TTT (F), TCT (S), TGT (C), CAT (H), AAT (N), GAT (D)                   |
| L455     | TTG             | TCG (S), TGG (W), ATG (M), GTG (V), TTT (F), TTC (F)                   |
| F456     | TTT             | TCT (S), TAT (Y), TGT (C), CTT (L), ATT (I), GTT (V), TTA (L), TTG (L) |
| Y473     | TAT             | TTT (F), TCT (S), TGT (C), CAT (H), AAT (N), GAT (D)                   |
| A475     | GCC             | GTC (V), GAC (D), GGC (G), TCC (S), CCC (P), ACC (T)                   |

|      |     |                                                                        |
|------|-----|------------------------------------------------------------------------|
| G476 | GGT | TGT (C), CGT (R), AGT (S)                                              |
| S477 | AGC | ATC (I), ACC (T), AAC (N), TGC (C), CGC (R), GGC (G), AGA (R), AGG (R) |
| T478 | ACA | ATA (I), AAA (K), AGA (R), TCA (S), CCA (P), GCA (A)                   |
| C480 | TGT | TTT (F), TCT (S), TAT (Y), CGT (R), AGT (S), GGT (G), TGG (W)          |
| V483 | GTT | GCT (A), GAT (D), GGT (G), TTT (F), CTT (L), ATT (I)                   |
| E484 | GAA | GTA (V), GCA (A), GGA (G), CAA (Q), AAA (K), GAT (D), GAC (D)          |
| G485 | GGT | TGT (C), CGT (R), AGT (S)                                              |
| F486 | TTT | TCT (S), TAT (Y), TGT (C), CTT (L), ATT (I), GTT (V), TTA (L), TTG (L) |
| N487 | AAT | CAT (H), TAT (Y), GAT (D), ATT (I), ACT (T), AGT (S), AAA (K), AAG (K) |
| C488 | TGT | TTT (F), TCT (S), TAT (Y), CGT (R), AGT (S), GGT (G), TGG (W)          |
| Y489 | TAC | GGC (F), TCC (S), TGC (C), CAC (H), AAC (N), GAC (D)                   |
| F490 | TTT | TCT (S), TAT (Y), TGT (C), CTT (L), ATT (I), GTT (V), TTA (L), TTG (L) |
| L492 | TTA | TCA (S), ATA (I), GTA (V), TTT (F), TTC (F)                            |
| Q493 | CAA | CTA (L), CCA (P), CGA (R), AAA (K), GAA (E), CAT (H), CAC (H)          |
| S494 | TCA | TTA (L), CCA (P), ACA (T), GCA (A)                                     |
| G496 | GGT | TGT (C), CGT (R), AGT (S)                                              |
| P499 | CCC | CTC (L), CAC (H), CGC (R), TCC (S), ACC (T), GCC (A)                   |
| T500 | ACT | ATT (I), AAT (N), AGT (S), TCT (S), CCT (P), GCT (A)                   |
| Y505 | TAC | GGC (F), TCC (S), TGC (C), CAC (H), AAC (N), GAC (D)                   |

**Supplementary Table 5. Statistics of the Cryo-EM dataset and data processing**

|                             | Spike-NIV-8                                                             |           |           | Spike-NIV-10                                                            |           |           |           | Spike-NIV-11                                                            |           | Spike-NIV-13                                                            |           |           |           |
|-----------------------------|-------------------------------------------------------------------------|-----------|-----------|-------------------------------------------------------------------------|-----------|-----------|-----------|-------------------------------------------------------------------------|-----------|-------------------------------------------------------------------------|-----------|-----------|-----------|
| Structures                  | state1                                                                  | state2    | RBD-Fab   | state1                                                                  | state2    | state3    | RBD-Fab   | global                                                                  | RBD-Fab   | state1                                                                  | state2    | state3    | RBD-Fab   |
| EMDB ID                     | EMD-33821                                                               | EMD-33822 | EMD-33820 | EMD-33824                                                               | EMD-33825 | EMD-33826 | EMD-33823 | EMD-34741                                                               | EMD-34742 | EMD-33828                                                               | EMD-33829 | EMD-33830 | EMD-33827 |
| PDB ID                      | -                                                                       | 7YH7      | 7YH6      | -                                                                       | -         | -         | -         | 8HGL                                                                    | 8HGM      | -                                                                       | -         | -         | -         |
| <b>Data collection</b>      |                                                                         |           |           |                                                                         |           |           |           |                                                                         |           |                                                                         |           |           |           |
| Microscope                  | Krios G4                                                                |           |           | Krios G4                                                                |           |           |           | Krios G4                                                                |           | Krios G4                                                                |           |           |           |
| Detector                    | Gatan Biocontinuum energy filter with Gatan K3 direct electron detector |           |           | Gatan Biocontinuum energy filter with Gatan K3 direct electron detector |           |           |           | Gatan Biocontinuum energy filter with Gatan K3 direct electron detector |           | Gatan Biocontinuum energy filter with Gatan K3 direct electron detector |           |           |           |
| Voltage (kV)                | 300                                                                     |           |           | 300                                                                     |           |           |           | 300                                                                     |           | 300                                                                     |           |           |           |
| Nominal magnification       | 130,000                                                                 |           |           | 130,000                                                                 |           |           |           | 130,000                                                                 |           | 130,000                                                                 |           |           |           |
| Defocusrange (µm)           | -1.0 to -2.0                                                            |           |           | -1.0 to -2.0                                                            |           |           |           | -0.8 to -2.3                                                            |           | -1.0 to -2.0                                                            |           |           |           |
| Physical pixel (Å)          | 0.67                                                                    |           |           | 0.67                                                                    |           |           |           | 0.67                                                                    |           | 0.67                                                                    |           |           |           |
| Electron dose (e/Å)         | 57.32                                                                   |           |           | 57.32                                                                   |           |           |           | 51.41                                                                   |           | 57.32                                                                   |           |           |           |
| Number of raw frames        | 50                                                                      |           |           | 50                                                                      |           |           |           | 50                                                                      |           | 50                                                                      |           |           |           |
| <b>Data processing</b>      |                                                                         |           |           |                                                                         |           |           |           |                                                                         |           |                                                                         |           |           |           |
| Extracted particles (n)     | 206354                                                                  |           |           | 485798                                                                  |           |           |           | 1498301                                                                 |           | 766695                                                                  |           |           |           |
| Particles for final map (n) | 13430                                                                   | 27741     | 64245     | 51840                                                                   | 40003     | 21536     | 42213     | 61135                                                                   | 80132     | 84408                                                                   | 47157     | 69019     | 84408     |
| Symmetry imposed            | C1                                                                      | C1        | C1        | C1                                                                      | C1        | C1        | C1        | C3                                                                      | C1        | C1                                                                      | C1        | C1        | C1        |
| Resolution                  | 4.0                                                                     | 3.3       | 3.4       | 3.0                                                                     | 3.2       | 3.4       | 4.2       | 2.9                                                                     | 3.4       | 3.2                                                                     | 3.4       | 3.3       | 4.1       |
| FSC threshold               | 0.143                                                                   | 0.143     | 0.143     | 0.143                                                                   | 0.143     | 0.143     | 0.143     | 0.143                                                                   | 0.143     | 0.143                                                                   | 0.143     | 0.143     | 0.143     |

**Supplementary Table 6. Statistics of the Cryo-EM structure refinement and validation**

|                          | <b>Spike-NIV-8 state 2<br/>PDB 7YH7</b> | <b>Spike-NIV-8 RBD-Fab<br/>PDB 7YH6</b>                        | <b>Spike-NIV-11 global<br/>PDB 8HGL</b> | <b>Spike-NIV-11 RBD-<br/>Fab PDB 8HGM</b>                      |
|--------------------------|-----------------------------------------|----------------------------------------------------------------|-----------------------------------------|----------------------------------------------------------------|
| Initial model used       | PDB : 6VYB                              | PDB : 6M0J and<br>predicted structure<br>model using AlphaFold | PDB: 7K4N                               | PDB : 7K45 and<br>predicted structure<br>model using AlphaFold |
| <b>Model composition</b> |                                         |                                                                |                                         |                                                                |
| Non-hydrogen atoms       | 28346                                   | 3343                                                           | 34170                                   | 4886                                                           |
| Protein residues         | 3574                                    | 430                                                            | 4317                                    | 632                                                            |
| Ligands                  | 45                                      | 1                                                              | 60                                      | 2                                                              |
| <b>R.m.s. deviations</b> |                                         |                                                                |                                         |                                                                |
| Bond length (Å)          | 0.003                                   | 0.005                                                          | 0.006                                   | 0.003                                                          |
| Bond angles (°)          | 0.502                                   | 0.629                                                          | 0.640                                   | 0.579                                                          |
| <b>Validation</b>        |                                         |                                                                |                                         |                                                                |
| MolProbity score         | 1.56                                    | 1.89                                                           | 1.76                                    | 1.68                                                           |
| Clash score              | 5.11                                    | 7.83                                                           | 7.28                                    | 6.98                                                           |
| Rotamer outliers (%)     | 0                                       | 0                                                              | 0                                       | 0                                                              |
| <b>Ramachandran plot</b> |                                         |                                                                |                                         |                                                                |
| Outliers (%)             | 0                                       | 0.24                                                           | 0                                       | 0                                                              |
| Allowed                  | 4.21                                    | 7.08                                                           | 5.29                                    | 4.31                                                           |
| Favored                  | 95.79                                   | 92.69                                                          | 94.71                                   | 95.69                                                          |
| <b>Model vs. Data</b>    |                                         |                                                                |                                         |                                                                |
| CC (mask)                | 0.83                                    | 0.85                                                           | 0.80                                    | 0.85                                                           |



**Supplementary Table 7. Statistics of the crystal structure refinement and validation**

| RBD_NIV-10 (PDB: 8HES)            |                                 |
|-----------------------------------|---------------------------------|
| Data collection                   |                                 |
| Wavelength                        | 1.0000                          |
| Resolution range                  | 47.31 - 2.20 (2.27 - 2.20)      |
| Space group                       | <i>P</i> 212121                 |
| Unit cell                         | 53.147 101.113 134.265 90 90 90 |
| Total reflections                 | 254148 (22170)                  |
| Unique reflections                | 36935 (3145)                    |
| Multiplicity                      | 6.9 (7.0)                       |
| Completeness (%)                  | 98.5 (98.9)                     |
| Mean I/sigma(I)                   | 7.8 (1.5)                       |
| Wilson B-factor (Å <sup>2</sup> ) | 38.47                           |
| R-merge                           | 0.152 (1.588)                   |
| R-meas                            | 0.164 (1.714)                   |
| R-pim                             | 0.062 (0.639)                   |
| CC1/2                             | 0.991 (0.722)                   |
| Refinement                        |                                 |
| Reflections used in refinement    | 36857 (3629)                    |
| Reflections used for R-free       | 1785 (177)                      |
| R-work                            | 0.1952 (0.2743)                 |
| R-free                            | 0.2381 (0.3219)                 |
| Number of non-hydrogen atoms 4985 |                                 |
| macromolecules                    | 4735                            |
| ligands                           | 14                              |
| solvent                           | 236                             |
| Protein residues                  | 620                             |
| RMS(bonds)                        | 0.008                           |
| RMS(angles)                       | 1.03                            |
| Ramachandran favored (%)          | 96.86                           |
| Ramachandran allowed (%)          | 2.97                            |

|                                     |       |
|-------------------------------------|-------|
| Ramachandran outliers (%)           | 0.17  |
| Rotamer outliers (%)                | 0.96  |
| Clashscore                          | 5.8   |
| Average B-factor ( $\text{\AA}^2$ ) | 44.17 |
| macromolecules                      | 44.2  |
| ligands                             | 62.59 |
| solvent                             | 42.65 |
| Number of TLS groups                | 13    |

---
